# Supplementary material
Source: PubMed Central journal article supplement (PMC2849654)

Type of file: figure

Label: Figure 1

Filename: Final\_Supplemental\_Figure\_1.pdf

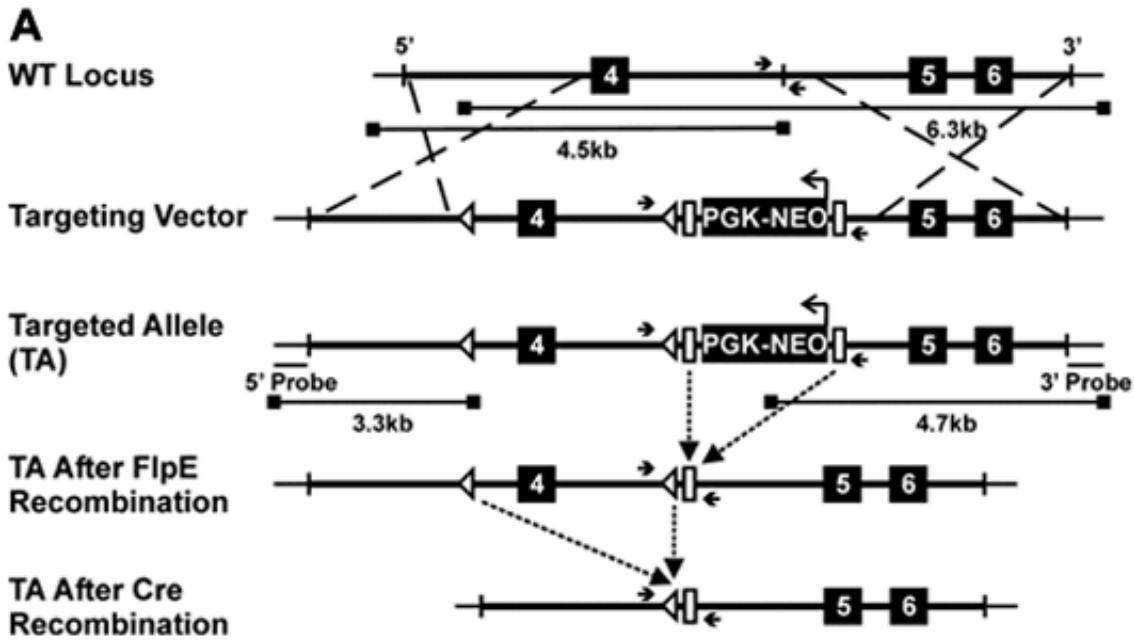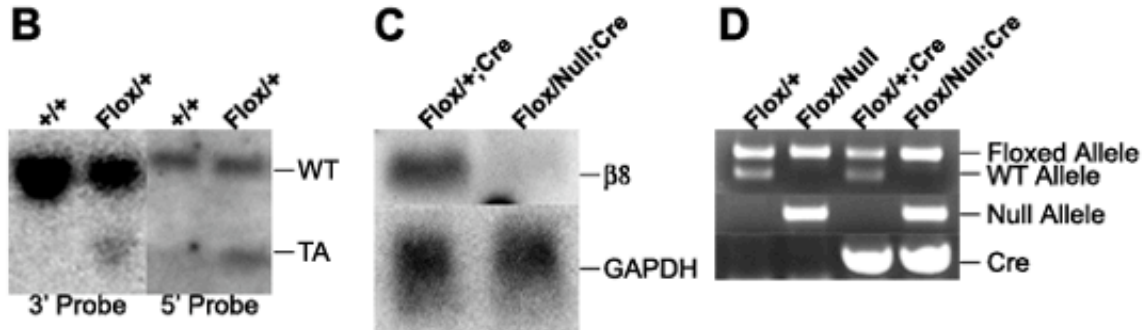

Type of file: figure

Label: Figure 2

Filename: Final\_Supplemental\_Figure\_2.pdf

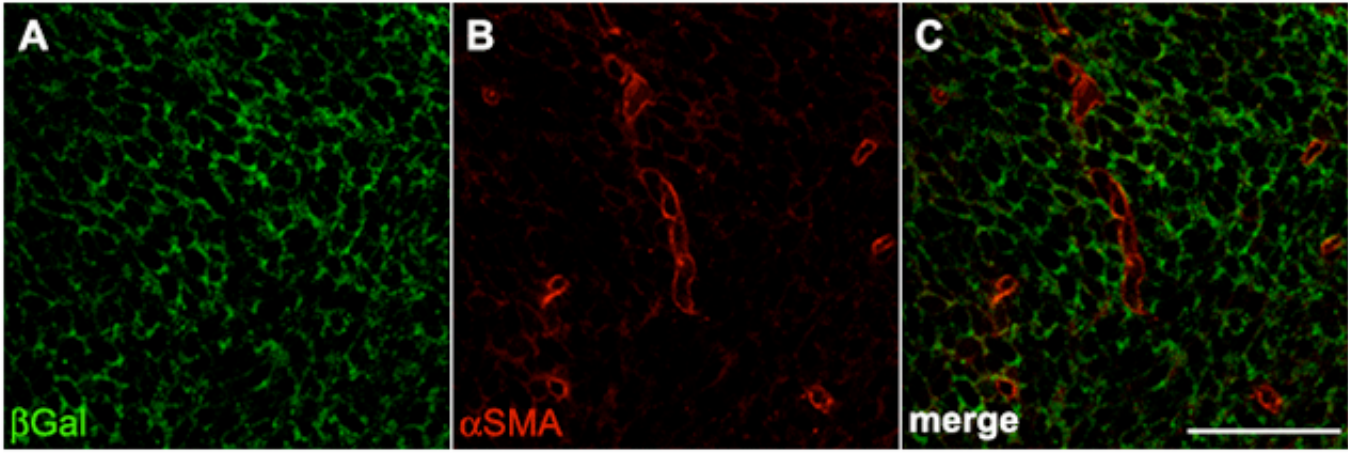

Type of file: figure

Label: Figure 3

Filename: Final\_Supplemental\_Figure\_3.pdf

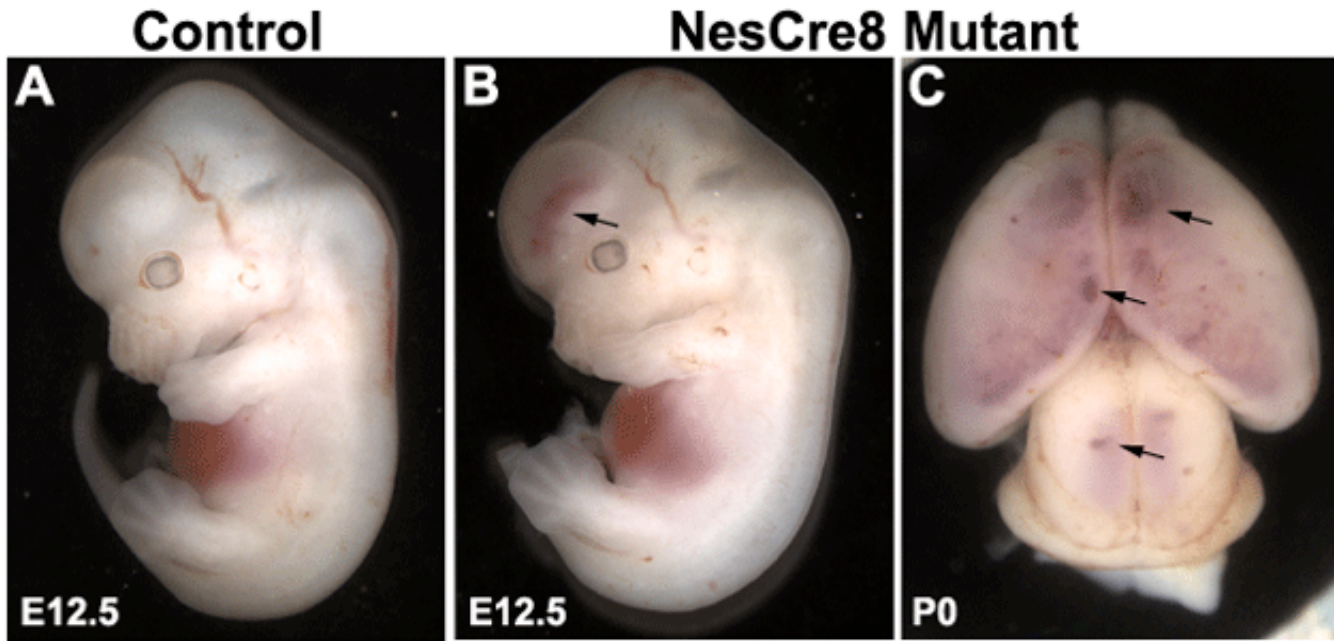

Supplement: NIHMS111485-supplement-01.pdf [file NIHMS111485-supplement-01.pdf]
